# Supplementary material
Source: MDPI journal article supplement (https://www.mdpi.com/2311-7524/7/7/198)
Supplement: s1 [file s1]

## Supplementary Materials

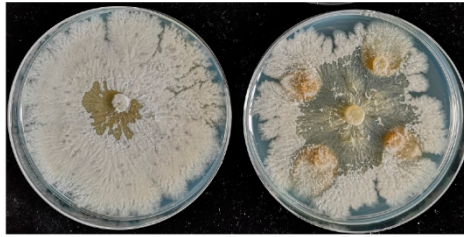

Supplementary Figure S1. The endophyte strain ZZ5 did not show antagonistic activity to *V. pyri*. After inoculation with ZZ5 for 2 days, a mycelial plug (5 mm in diameter) of *V. pyri* was placed in the center on PDA medium. The pictures were taken at 6 days after inoculation.

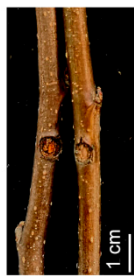

Supplementary Figure S2. Strain ZZ1 did not cause disease symptoms on pear branch. The branches were punched at the midpoint of each branch (5 mm in diameter) and sprayed with ZZ1 conidial suspensions ( $10^8$  conidia/mL). The picture was taken at 10 days after spraying.
